# Supplementary material
Source: ML conference proceedings conference paper supplement (https://openreview.net/forum?id=7XgTh3i8FI)

**Operators:**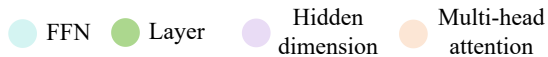

multi-stages growth  $M_1 \rightarrow M_5$

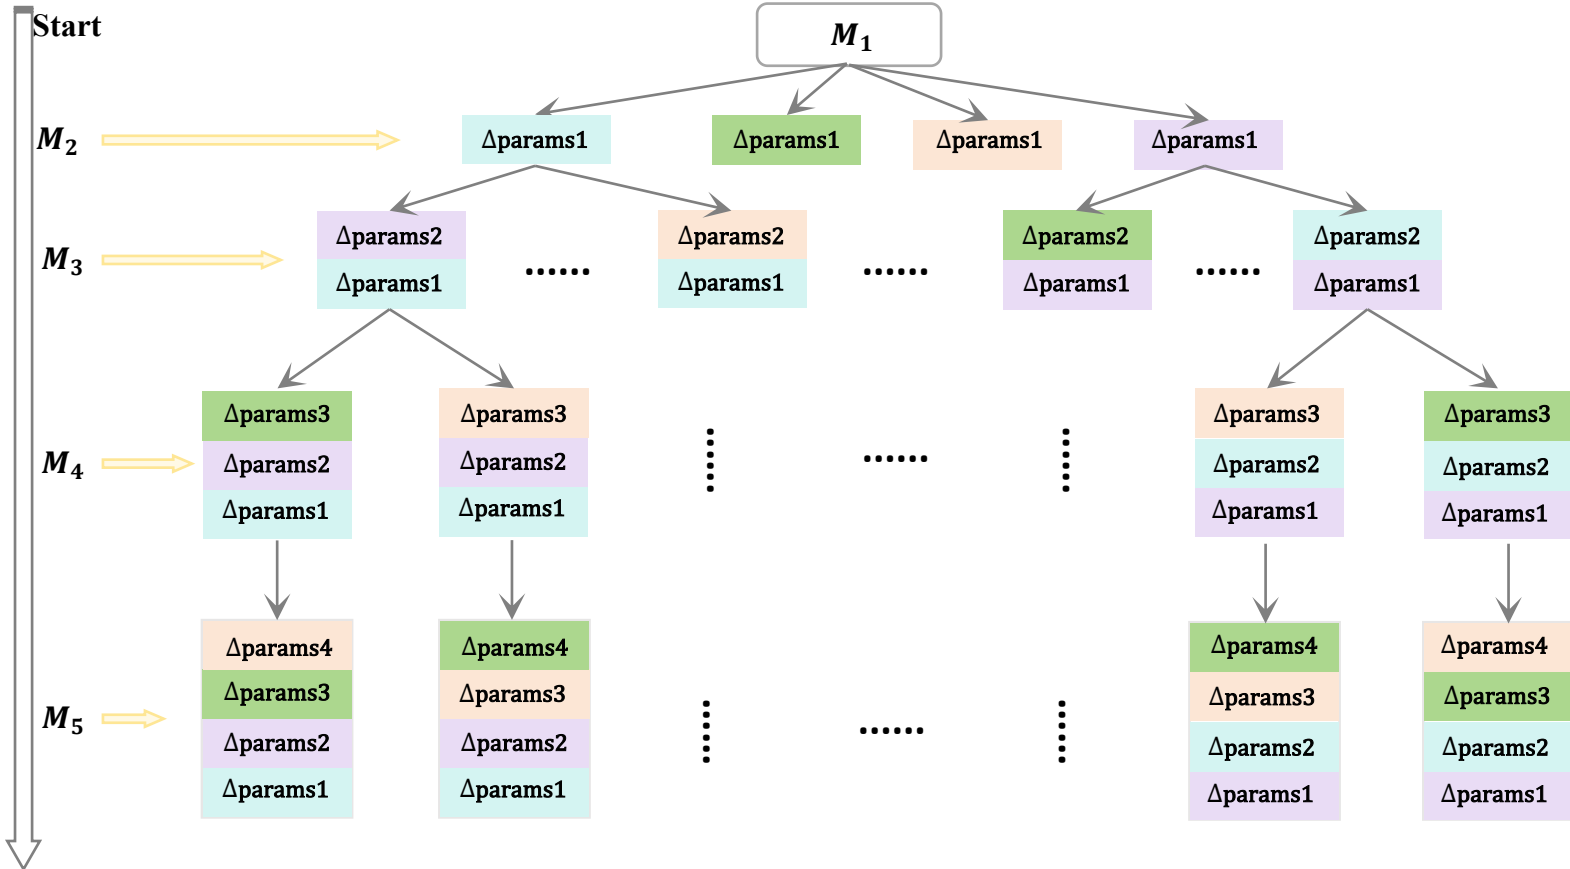

Supplement: supplementary_material [file attachment]
